# Supplementary material for: Comparative Proteomics of Marinobacter sp. TT1 Reveals Corexit Impacts on Hydrocarbon Metabolism, Chemotactic Motility, and Biofilm Formation
Source: MDPI journal article supplement (doi:10.3390/microorganisms9010003), 2020-12-22
Supplement: s1 [file s1]

## Supplementary Material

# Comparative proteomics of *Marinobacter* sp. TT1 reveals Corexit impacts on hydrocarbon metabolism, chemotactic motility and biofilm formation

Saskia Rughöft <sup>1</sup>, Nico Jehmlich <sup>2</sup>, Tony Gutierrez <sup>3</sup> and Sara Kleindienst <sup>1,\*</sup>

<sup>1</sup> Microbial Ecology, Center for Applied Geosciences, University of Tübingen, Tübingen, Germany

<sup>2</sup> Department of Molecular Systems Biology, Helmholtz Centre for Environmental Research –UFZ GmbH, Leipzig, Germany

<sup>3</sup> Institute of Mechanical, Process & Energy Engineering, Heriot-Watt University, Edinburgh, UK

\* Correspondence: [sara.kleindienst@uni-tuebingen.de](mailto:sara.kleindienst@uni-tuebingen.de)

## Supplementary Figures

|                       | Control                             | Hydrocarbon treatments                  |                                                                                  |                                     |                                      |                                        |
|-----------------------|-------------------------------------|-----------------------------------------|----------------------------------------------------------------------------------|-------------------------------------|--------------------------------------|----------------------------------------|
| Treatment             | Pyruvate                            | Hxdc                                    | Hxdc+Cxt                                                                         | Corexit                             | WAF                                  | CEWAF                                  |
| Pre-culture substrate | pyruvate                            | hexadecane                              | hexadecane                                                                       | Corexit                             | WAF                                  | WAF                                    |
| Carbon sources        | pyruvate<br>(3 mM)                  | hexadecane<br>(100 mg l <sup>-1</sup> ) | hexadecane<br>(100 mg l <sup>-1</sup> )<br>+ Corexit<br>(10 mg l <sup>-1</sup> ) | Corexit<br>(10 mg l <sup>-1</sup> ) | WAF<br>(6 mg l <sup>-1</sup><br>DOC) | CEWAF<br>(6 mg l <sup>-1</sup><br>DOC) |
| Corexit 9500          | ✗                                   | ✗                                       | ✓                                                                                | ✓                                   | ✗                                    | ✓                                      |
|                       | ↓ 1 day                             | ↓ 4 days                                | ↓ 4 days                                                                         | ↓ 4 days                            | ↓ 4 days                             | ↓ 4 days                               |
| Analyses              | proteome<br>pyruvate<br>cell counts | proteome<br>hexadecane<br>cell counts   | proteome<br>hexadecane<br>cell counts                                            | proteome<br>cell counts             | proteome<br>cell counts              | proteome<br>cell counts                |

**Figure S1:** Overview of culture conditions assessed in this proteomics study. Additional non-proteomics treatments included an inoculated control culture with no added substrate and abiotic controls containing either 100 mg l<sup>-1</sup> *n*-hexadecane or 100 mg l<sup>-1</sup> *n*-hexadecane and 10 mg l<sup>-1</sup> Corexit. Abbreviations: Hxdc = *n*-hexadecane, Cxt = Corexit EC9500A, WAF = water-accommodated fraction, CEWAF = chemically enhanced WAF, DOC = dissolved organic carbon.

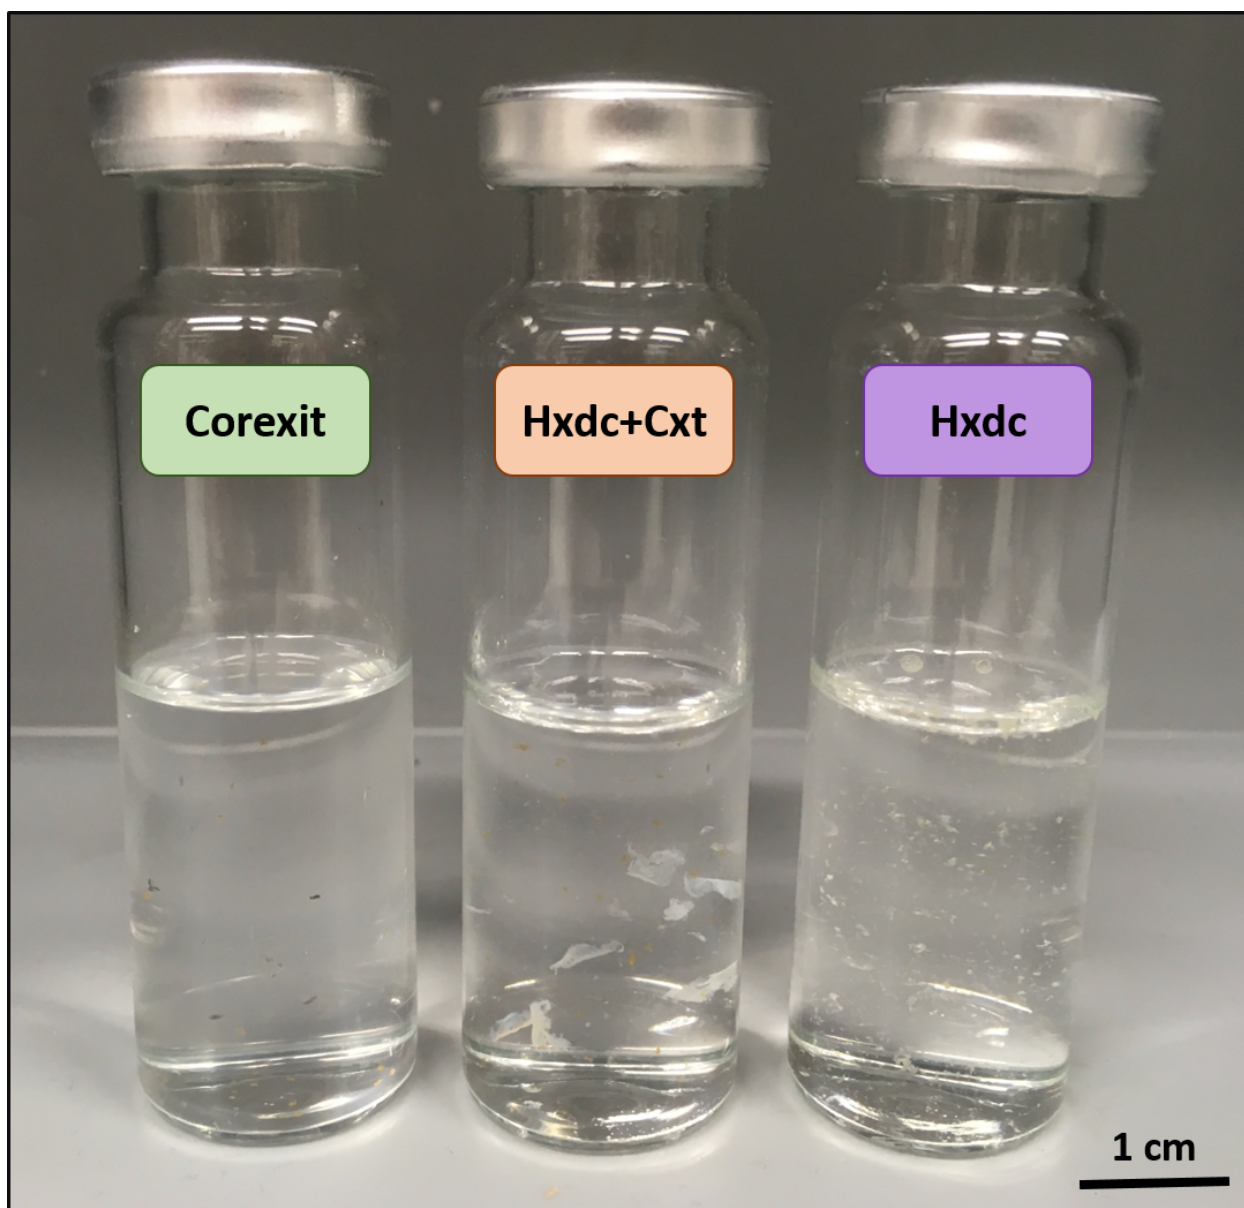

**Figure S2:** Aggregate morphology in *Marinobacter* sp. TT1 cultures after four days of incubation. Treatments contained the following carbon sources: 100 mg l<sup>-1</sup> Corexit (Corexit), 100 mg l<sup>-1</sup> *n*-hexadecane and 10 mg l<sup>-1</sup> Corexit (Hxdc+Cxt), or 100 mg l<sup>-1</sup> *n*-hexadecane (Hxdc).

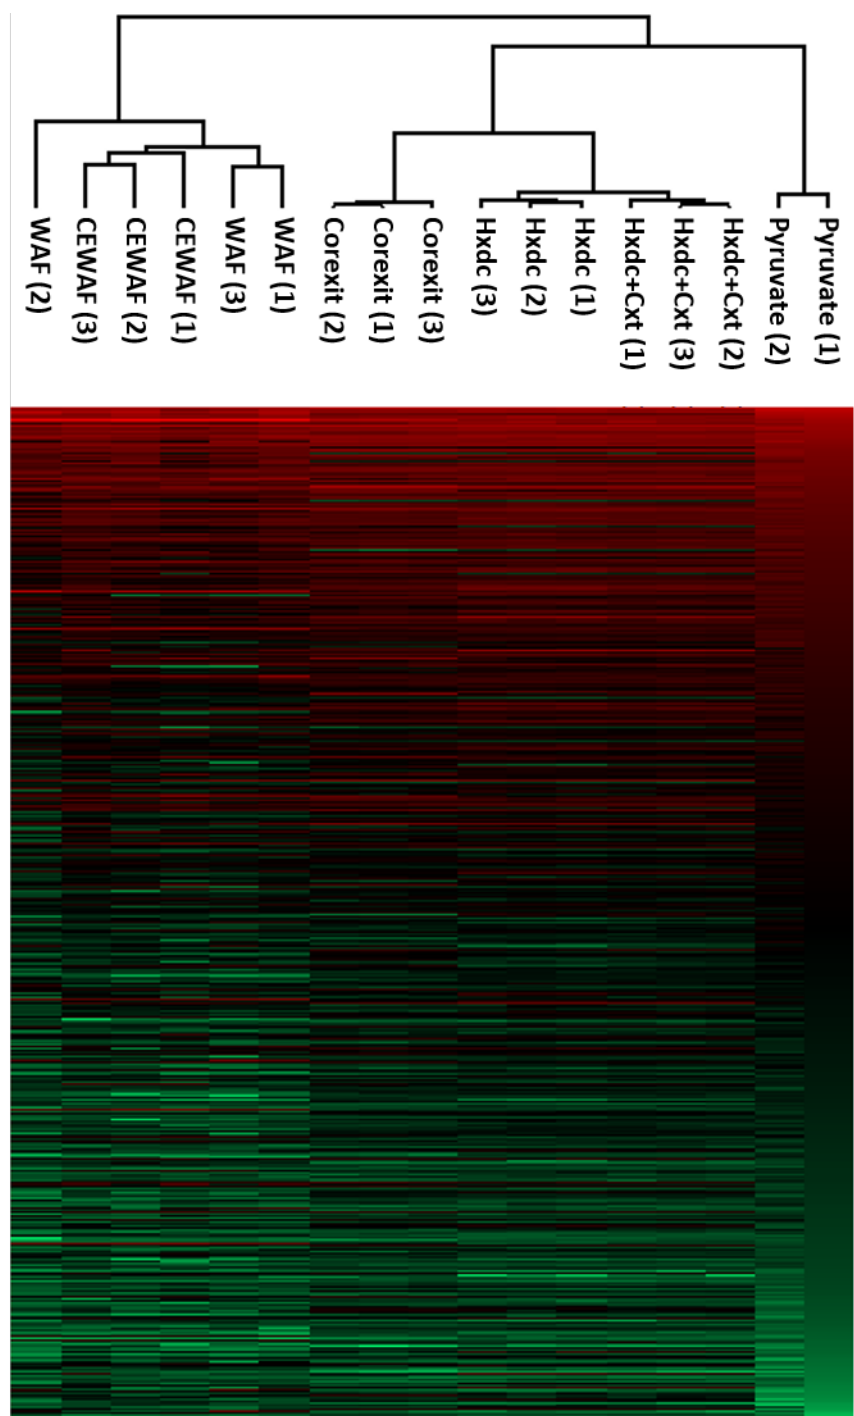

**Figure S3:** Hierarchical clustering analysis (including heatmap) of protein expression profiles of *Marinobacter* sp. TT1 cultures after 1 day (pyruvate treatments) or 4 days (all other treatments) of incubation. Treatments received the following carbon sources: 3 mM (264 mg l<sup>-1</sup>) pyruvate (Pyruvate), 100 mg l<sup>-1</sup> *n*-hexadecane (Hxdc), 100 mg l<sup>-1</sup> *n*-hexadecane and 10 mg l<sup>-1</sup> Corexit (Hxdc+Cxt), 100 mg l<sup>-1</sup> Corexit (Corexit), 6 mg l<sup>-1</sup> WAF-derived DOC (WAF), or 6 mg l<sup>-1</sup> chemically enhanced WAF-derived DOC (CEWAF).

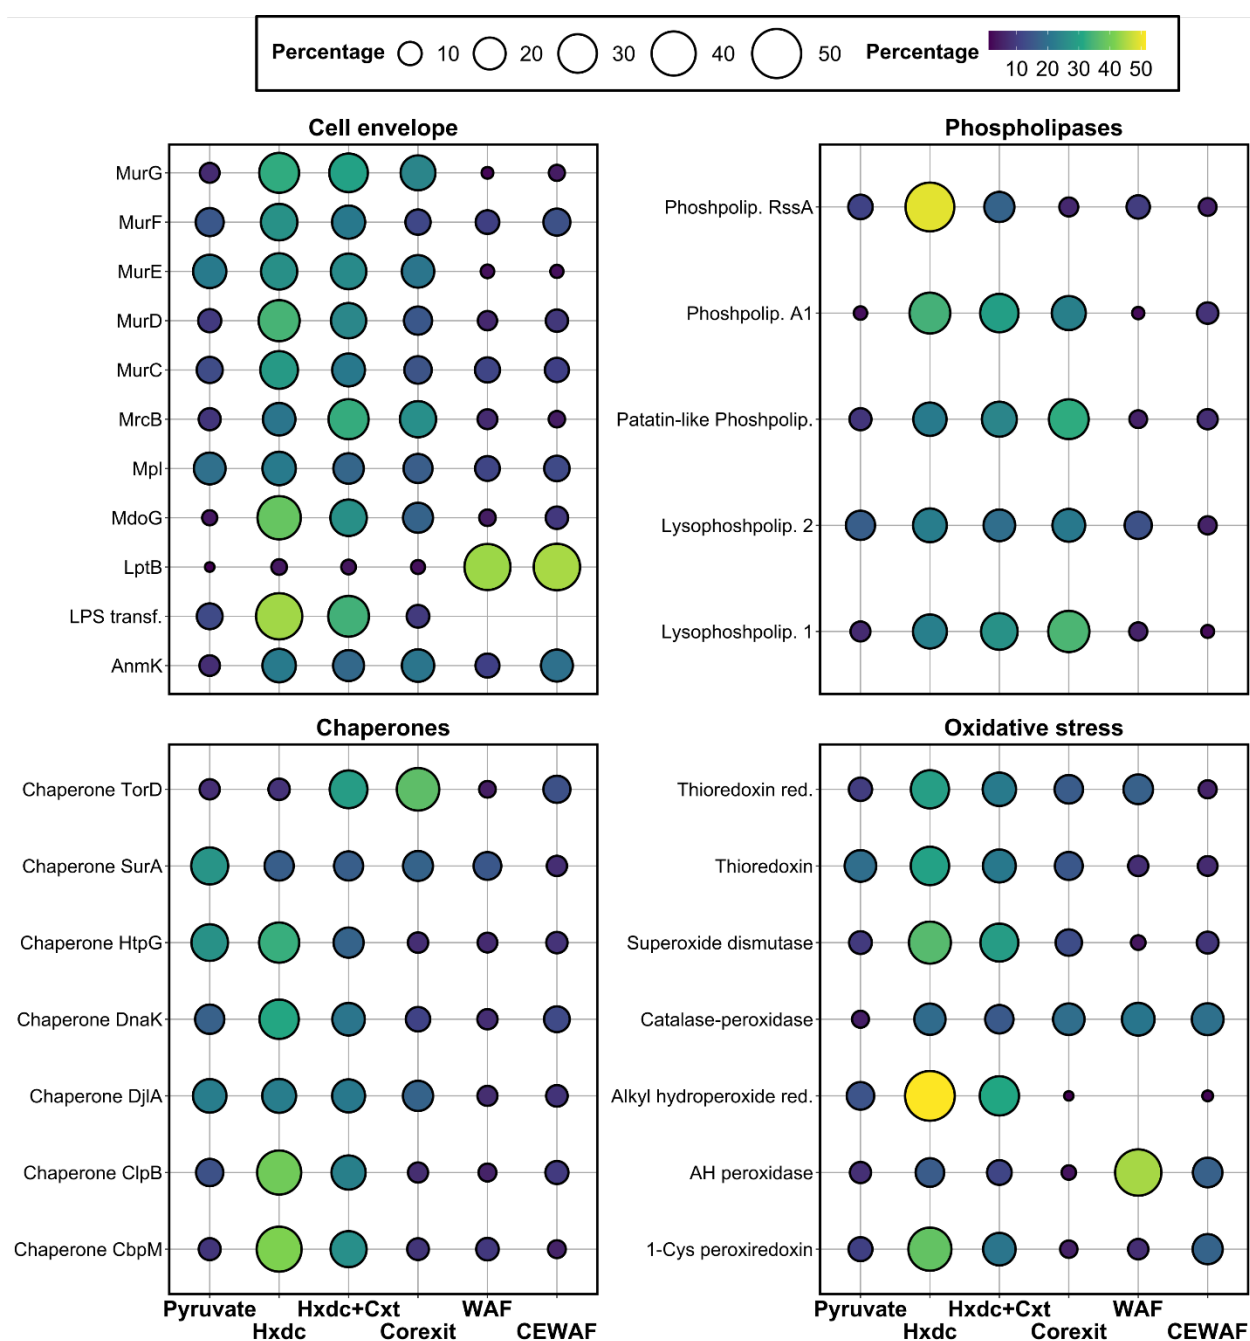

**Figure S4:** Normalized, relative mean abundances (symbolized by circle size and colour; sum per protein = 100%) of significantly ( $q$ -value < 0.05) differentially expressed proteins associated with peptidoglycan and LPS synthesis (Cell envelope), phospholipases, chaperones, oxidative stress response enzymes during growth of *Marinobacter* sp. TT1 cultures on different carbon sources. Treatments received either pyruvate, *n*-hexadecane (Hxdc), *n*-hexadecane and Corexit (Hxdc+Cxt), only Corexit (Corexit), crude oil WAF, or chemically enhanced WAF (CEWAF). Protein names/abbreviations given as indicated in Tab. S9.

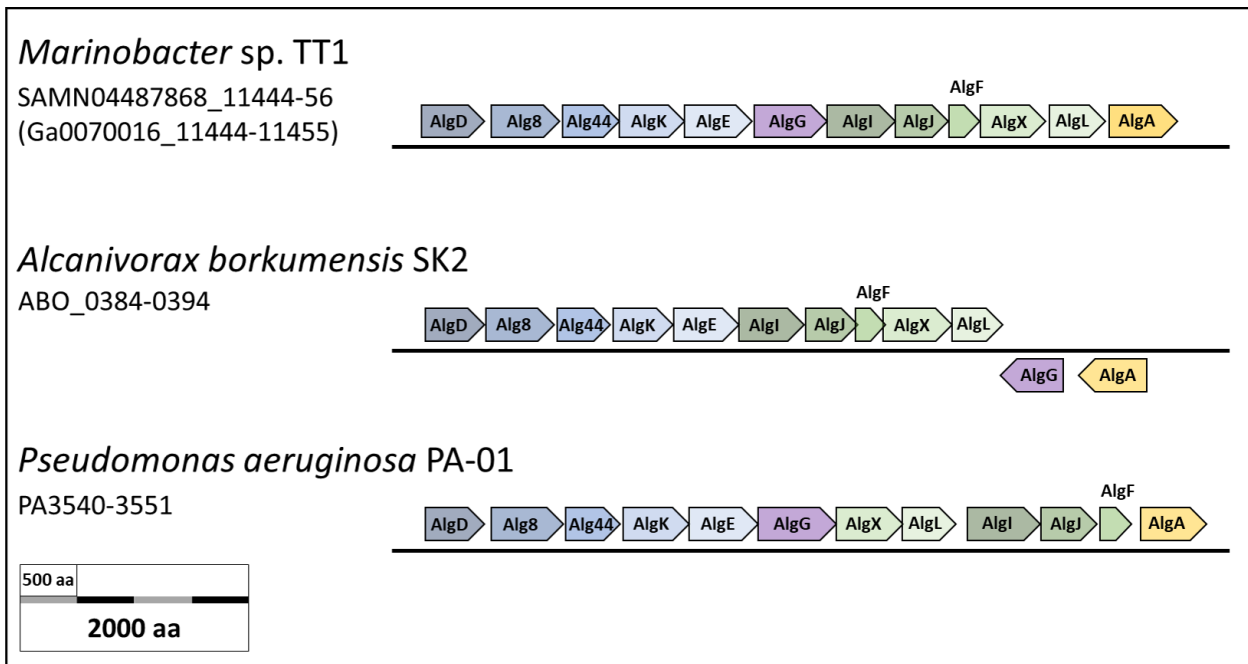

**Figure S5:** Genetic organization of alginate operons in *Pseudomonas aeruginosa* PAO1 (IMG genome ID: 637000218), *Alcanivorax borkumensis* SK2 (IMG genome ID: 637000004) and the proposed alginate operon in *Marinobacter* sp. TT1 (displayed gene names based on genome annotation and/or homologous *P. aeruginosa* genes; IMG genome ID: 2619618959).

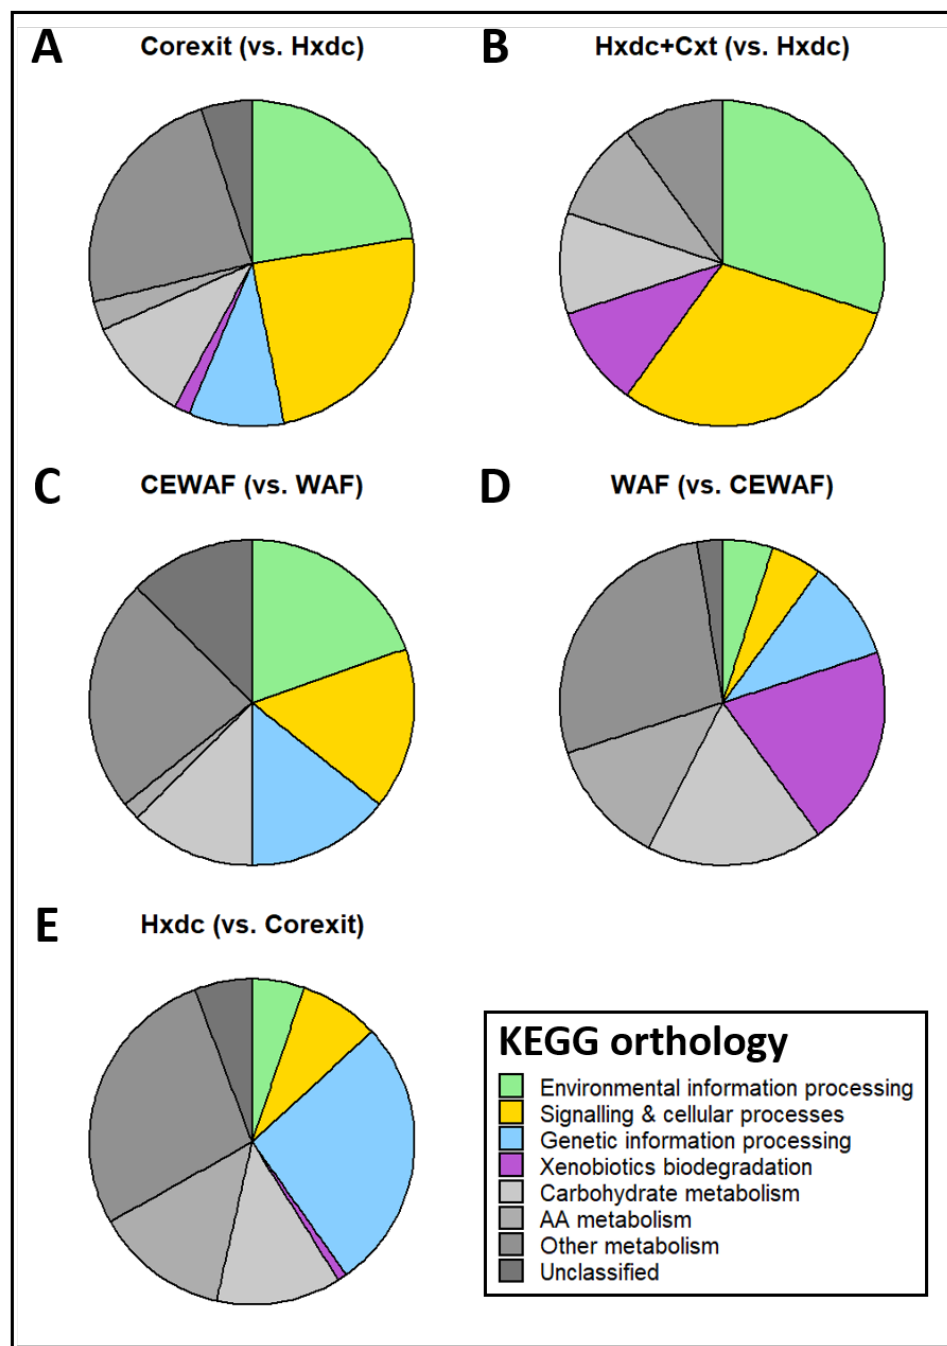

**Figure S4:** KEGG orthology annotations for significantly ( $p$ -value  $< 0.05$ ; WAF vs. CEWAF: t-test  $p$ -value  $< 0.05$ ) more abundant proteins in pairwise comparisons of *Marinobacter* sp. TT1 proteomes during growth on different carbon sources. Treatments received either pyruvate, *n*-hexadecane (Hxdc), *n*-hexadecane and Corexit (Hxdc+Cxt), only Corexit (Corexit), crude oil WAF, or chemically enhanced WAF (CEWAF). **A)** Significantly upregulated proteins in Corexit compared to Hxdc cultures. **B)** Significantly upregulated proteins in Hxdc+Cxt compared to Hxdc cultures. **C)** Significantly upregulated proteins in CEWAF compared to WAF cultures. **D)** Significantly upregulated proteins in WAF compared to CEWAF cultures. **E)** Significantly upregulated proteins in Hxdc compared to Corexit cultures.

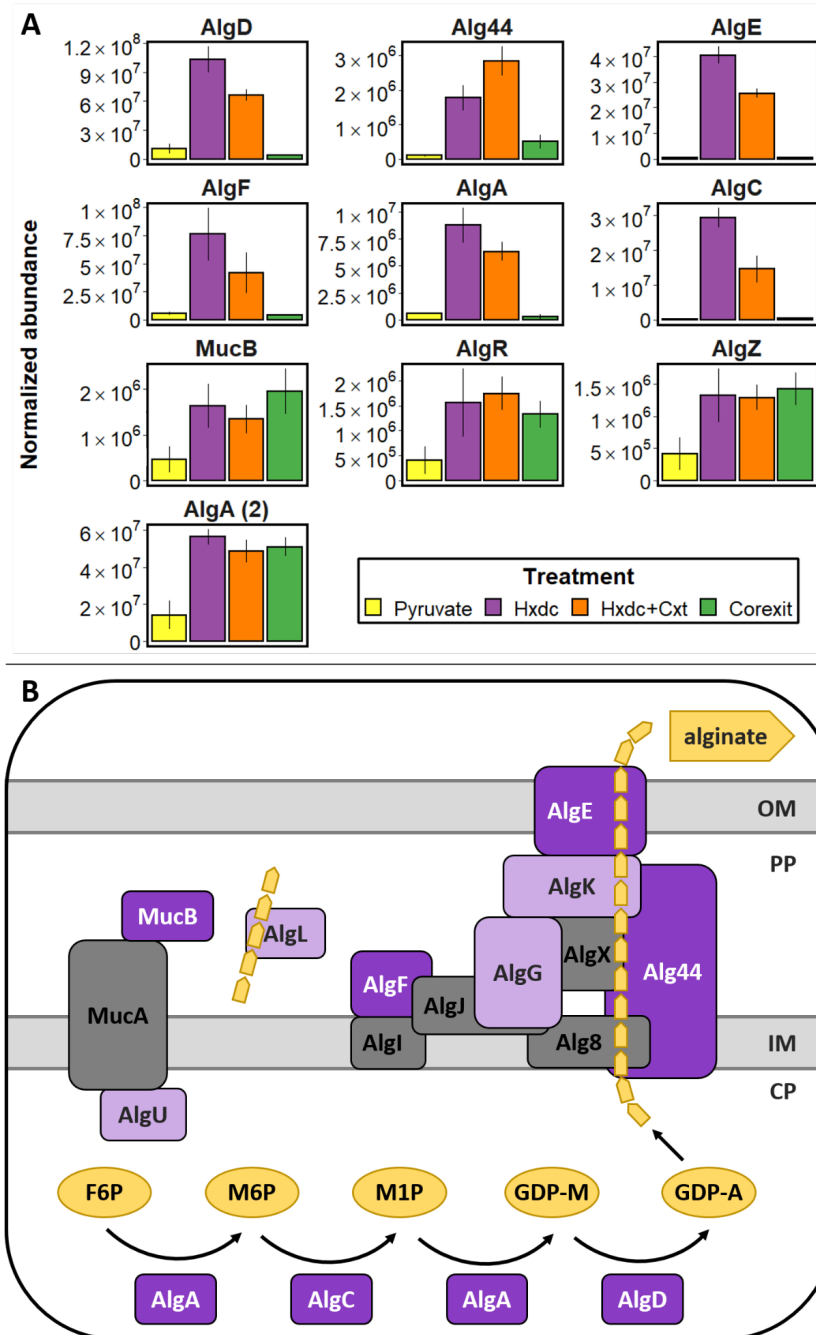

**Figure S5:** Alginate biosynthesis and export in *Marinobacter* sp. TT1. **A)** Normalized abundances (averages  $\pm$  SD;  $n = 3$ ) of significantly ( $q$ -value  $< 0.05$ ) differentially abundant alginate protein homologues during growth on different carbon sources. Treatments received 3 mM (264 mg l<sup>-1</sup>) pyruvate (Pyruvate), 100 mg l<sup>-1</sup> *n*-hexadecane (Hxdc), 100 mg l<sup>-1</sup> *n*-hexadecane and 10 mg l<sup>-1</sup> Corexit (Hxdc+Cxt), or 100 mg l<sup>-1</sup> Corexit (Corexit). **B)** Schematic overview of the proposed alginate biosynthesis complex in *Marinobacter* sp. TT1 based on the alginate complex in *Pseudomonas aeruginosa* (Hay *et al.*, 2013). Proteins are coloured in dark purple, light purple or grey to illustrate significantly higher abundances in *n*-hexadecane compared to pyruvate treatments, their detection or lack thereof in this study, respectively. Protein names given as indicated in Tab. S9. OM/IM = outer/inner membrane; PP/CP = periplasm/cytoplasm; F6P = Fructose-6-phosphate; M6P/M1P = Mannose-6-phosphate/-1-phosphate; GDP-M/A = Guanosine diphosphate-mannose/mannuronic acid.



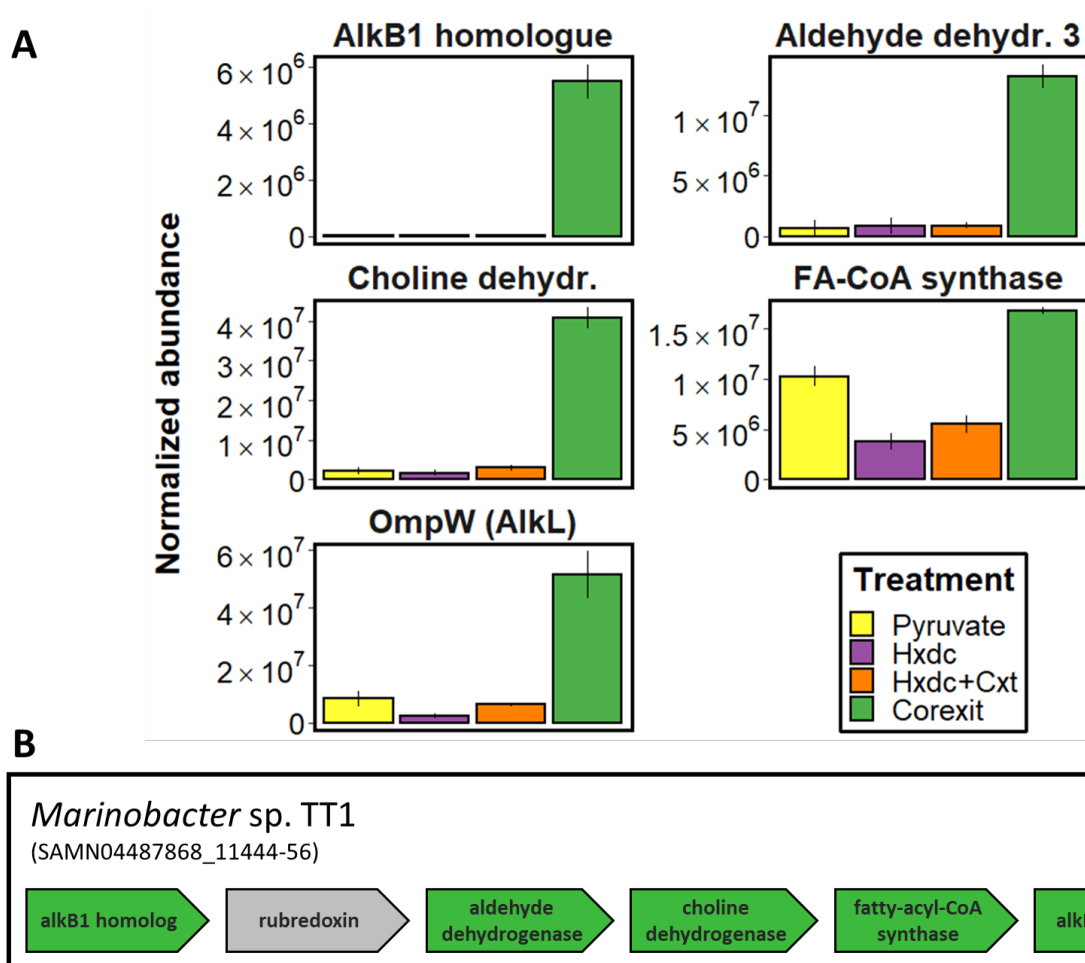

**Figure S6:** Proposed *alk* operon in *Marinobacter* sp. TT1. **A)** Normalized abundances (averages  $\pm$  SD;  $n = 3$ ) of significantly ( $q < 0.05$ ) differentially expressed proteins of the *alkB1* homologue operon during growth on different carbon sources. Treatments received either pyruvate, *n*-hexadecane (Hxdc), *n*-hexadecane and Corexit (Hxdc+Cxt), or only Corexit (Corexit). **B)** Schematic representation of the genes downstream of *alkB1* (proposed *alk* operon; SAMN04487868\_109138-42) in the genome of *Marinobacter* sp. TT1. Proteins encoded by green genes were significantly more abundant in Corexit treatments compared to Pyruvate, Hxdc or Hxdc+Cxt treatments. Proteins encoded by grey genes were not detected in this study. Protein names given as indicated in Tab. S9.



## References

Hay, I.D., Ur Rehman, Z., Moradali, M.F., Wang, Y., and Rehm, B.H. (2013) Microbial alginate production, modification and its applications. *Microb Biotechnol* **6**(6): 637-650.
